# Supplementary material for: Cohesin Mutations Induce Chromatin Conformation Perturbation of the H19/IGF2 Imprinted Region and Gene Expression Dysregulation in Cornelia de Lange Syndrome Cell Lines
Source: MDPI journal article supplement (doi:10.3390/biom11111622), 2021-11-02
Supplement: s1 [file s1]

**Table S3.** Quantitative CpGs methylation results of *IGF2/H19* (IC1), *MEST*, *PEG10*, *GNAS* and *GNAS-AS1* DMRs in CTRL and CdLS cell lines

| Sample | Mean Methylation Levels (%) |                  |                   |                  |                      |
|--------|-----------------------------|------------------|-------------------|------------------|----------------------|
|        | ICR1                        | <i>MEST</i> -DMR | <i>PEG10</i> -DMR | <i>GNAS</i> -DMR | <i>GNAS-AS1</i> -DMR |
| CTRL1  | 41                          | 42               | 42                | 31               | 22                   |
| CTRL2  | 36                          | 43               | 43                | 37               | 10                   |
| CTRL3  | 34                          | 47               | 35                | 38               | 21                   |
| CTRL4  | 38                          | 45               | 40                | N.A.             | N.A.                 |
| CdLS1  | 38                          | 36               | 41                | 32               | 30                   |
| CdLS2  | 9                           | 33               | 43                | 37               | 30                   |
| CdLS3  | 43                          | 60               | 44                | 20               | 23                   |
| CdLS4  | 44                          | 47               | 44                | 31               | 37                   |
| CdLS5  | 44                          | 52               | 43                | 31               | 30                   |
| CdLS6  | 40                          | 40               | 41                | 24               | 33                   |
| CdLS7  | 42                          | 35               | 42                | 4                | 8                    |
| CdLS8  | 45                          | 50               | 41                | 26               | 35                   |
| CdLS9  | 29                          | 37               | 41                | 42               | 30                   |

The results are the mean of two independent pyrosequencing experiments

N.A., not analyzable
