# Supplementary material for: Cohesin Mutations Induce Chromatin Conformation Perturbation of the H19/IGF2 Imprinted Region and Gene Expression Dysregulation in Cornelia de Lange Syndrome Cell Lines
Source: MDPI journal article supplement (doi:10.3390/biom11111622), 2021-11-02
Supplement: s1 [file s1]

Table S1: Customized panel of imprinted and imprinted related genes analyzed by NCounter Nanostring approach

| GENE            | Accession      | Position  | Target Sequence                                                                                           | Tot<br>Isoforms | Isoforms Hit<br>By Probe |
|-----------------|----------------|-----------|-----------------------------------------------------------------------------------------------------------|-----------------|--------------------------|
| <i>CDKN1C</i>   | NM_000076.2    | 1606-1705 | TGTCCAGGCGTGGACCGCTCTGCCACGCACTAGCTCGGTTATTGGTTATGCC<br>AAAGGCACTCTCCATCTCCCACATCTGGTTATTGACAAGTGTAACTTT  | 5               | 5                        |
| <i>DIRAS3</i>   | NM_004675.2    | 951-1050  | CTGAGAAGCTGCTTGACAAGTGCATAATCATGTGAGCCCTGGGCCTTAAGA<br>GCCAGCTCTTCTATCCTGTAGCGTGTAGAAAACGTGGACTCATTTCAC   | 1               | 1                        |
| <i>DLK1</i>     | NM_003836.4    | 1329-1428 | AGATTCTTGGAGTTCCGCAGAGCTTACTATACGCGGTCTGTCCTAATCTTTG<br>TGGTGTTTCGCTATCTCTTGTGTCAAATCTGGTGAACGCTACGCTTACA | 2               | 2                        |
| <i>FAM50B</i>   | NM_012135.1    | 1273-1372 | TTCTGAGTATTTTAGTGTGGCCACCTGGATTTGCTGCATTGCTCTGCTGAGC<br>TGTATTGAAACCATGACTGGGCCCCACTGTCAGACAGAAATTAGAATAG | 3               | 2                        |
| <i>GNAS</i>     | NM_080425.1    | 1911-2010 | CGAGAACCAGTTCAGAGTGGACTACATCCTGAGTGTGATGAACGTGCCTGA<br>CTTTGACTTCCCTCCCGAATTCTATGAGCATGCCAAGGCTCTGTGGGAG  | 29              | 24                       |
| <i>GNAS-AS1</i> | NR_002785.2    | 1027-1126 | ACGTCCGCTGGGAACTGGCTGCTCTGCAGGTTTCTGTATCACATTTTCTGCA<br>CATGTCCATTAGAATTGGAGATGGGGCGTATCTAGTGTTGAATAAAGG  | 1               | 1                        |
| <i>H19</i>      | NR_002196.1    | 1593-1692 | GGCCTTTGAATCCGGACACAAAACCCTCTAGCTTGGAATGAATATGCTGC<br>ACTTTACAACCACTGCACTACCTGACTCAGGAATCGGCTCTGGAAGGTG   | 3               | 3                        |
| <i>IGF1R</i>    | NM_000875.4    | 4581-4680 | TCTCCTGAGTCCCTCAAGGATGGAGTCTTCACCACTTACTCGGACGTCTGGT<br>CCTTCGGGGTCGTCCTCTGGGAGATCGCCACACTGGCCGAGCAGCCCT  | 9               | 9                        |
| <i>IGF2</i>     | NM_001127598.1 | 2418-2517 | ACACACACTCATGCGCAGCACATACATGAACACAGCTCACAGCACACAAA<br>CACGCAGCACACACGTTGCACACGCAAGCACCCACCTGCACACACACATG  | 7               | 3                        |
| <i>IGF2R</i>    | NM_000876.1    | 2606-2705 | TGCCGGGCTGCAACCGATATGCATCGGCTTGCCAGATGAAGTATGAAAAAG<br>ATCAGGGCTCCTTCACTGAAGTGGTTTCCATCAGTAACTTGGGAATGGC  | 1               | 1                        |
| <i>INSR</i>     | NM_000208.2    | 526-625   | CACCCGGGGTTCTGTCCGCATCGAGAAGAACAATGAGCTCTGTTACTTGGC<br>CACTATCGACTGGTCCCGTATCCTGGATTCCGTGGAGGATAATTACATC  | 4               | 4                        |

|                 |                |             |                                                                                                           |    |    |
|-----------------|----------------|-------------|-----------------------------------------------------------------------------------------------------------|----|----|
| <i>KCNQ1</i>    | NM_181798.1    | 836-935     | CAGACGTGGGTCGGGAAGACCATCGCCTCCTGCTTCTCTGTCTTTGCCATCT<br>CCTTCTTTGCGCTCCCAGCGGGGATTCTTGGCTCGGGGTTTGCCCTGA  | 2  | 2  |
| <i>KCNQ1OT1</i> | NR_002728.2    | 31876-31975 | GCCAGACATCAAATTGAGTGAGGGACATTGGACACAAAGGTGTATGAGTT<br>GCATCATTCCCACCGCATAAAGTTCAAATGTGGGCAAAGCTGGTCCTTGC  | 1  | 1  |
| <i>MEG3</i>     | NR_002766.2    | 692-791     | ATCTTCCTATCCTTTTCTGGGGGAATGGGGTCGATGAGAGCAACCTCCTAG<br>GGTTGTTGTGAGAATTAAATGAGATAAAAGAGGCCTCAGGCAGGATCTG  | 15 | 15 |
| <i>MEST</i>     | NM_177525.1    | 646-745     | CTCTGTCTGTCAAATGGAGGTATCTTTCCTGAGACTCACCGTCCACTCCTTC<br>TCCAAAAGCTACTCAAAGATGGAGGTGTGCTGTCACCCATCCTCACAC  | 10 | 10 |
| <i>PEG10</i>    | NM_001040152.1 | 5001-5100   | TTTGCCACCACTGCAAGCAAAAGTCTGGAGAAGTTCACCAACGACAAGAAC<br>GATTAGGGAAAATATGCTGCTGTGGGTAAACAACCTCAGAAAGTCCCTGA | 6  | 6  |
| <i>PLAGL1</i>   | NM_006718.3    | 1873-1972   | TCAGTTTGTGTTGAGGACTTGCCTCTGCAAGAGCCTCAGTCACCTCAAAAGCT<br>CAACCCAGGTTTTGATCTGGCTAAGGGAAATGCTGGTAAAGTAAACCT | 27 | 27 |
