# Supplementary material for: Cohesin Mutations Induce Chromatin Conformation Perturbation of the H19/IGF2 Imprinted Region and Gene Expression Dysregulation in Cornelia de Lange Syndrome Cell Lines
Source: MDPI journal article supplement (doi:10.3390/biom11111622), 2021-11-02
Supplement: s1 [file s1]

## CdLS9 interactions

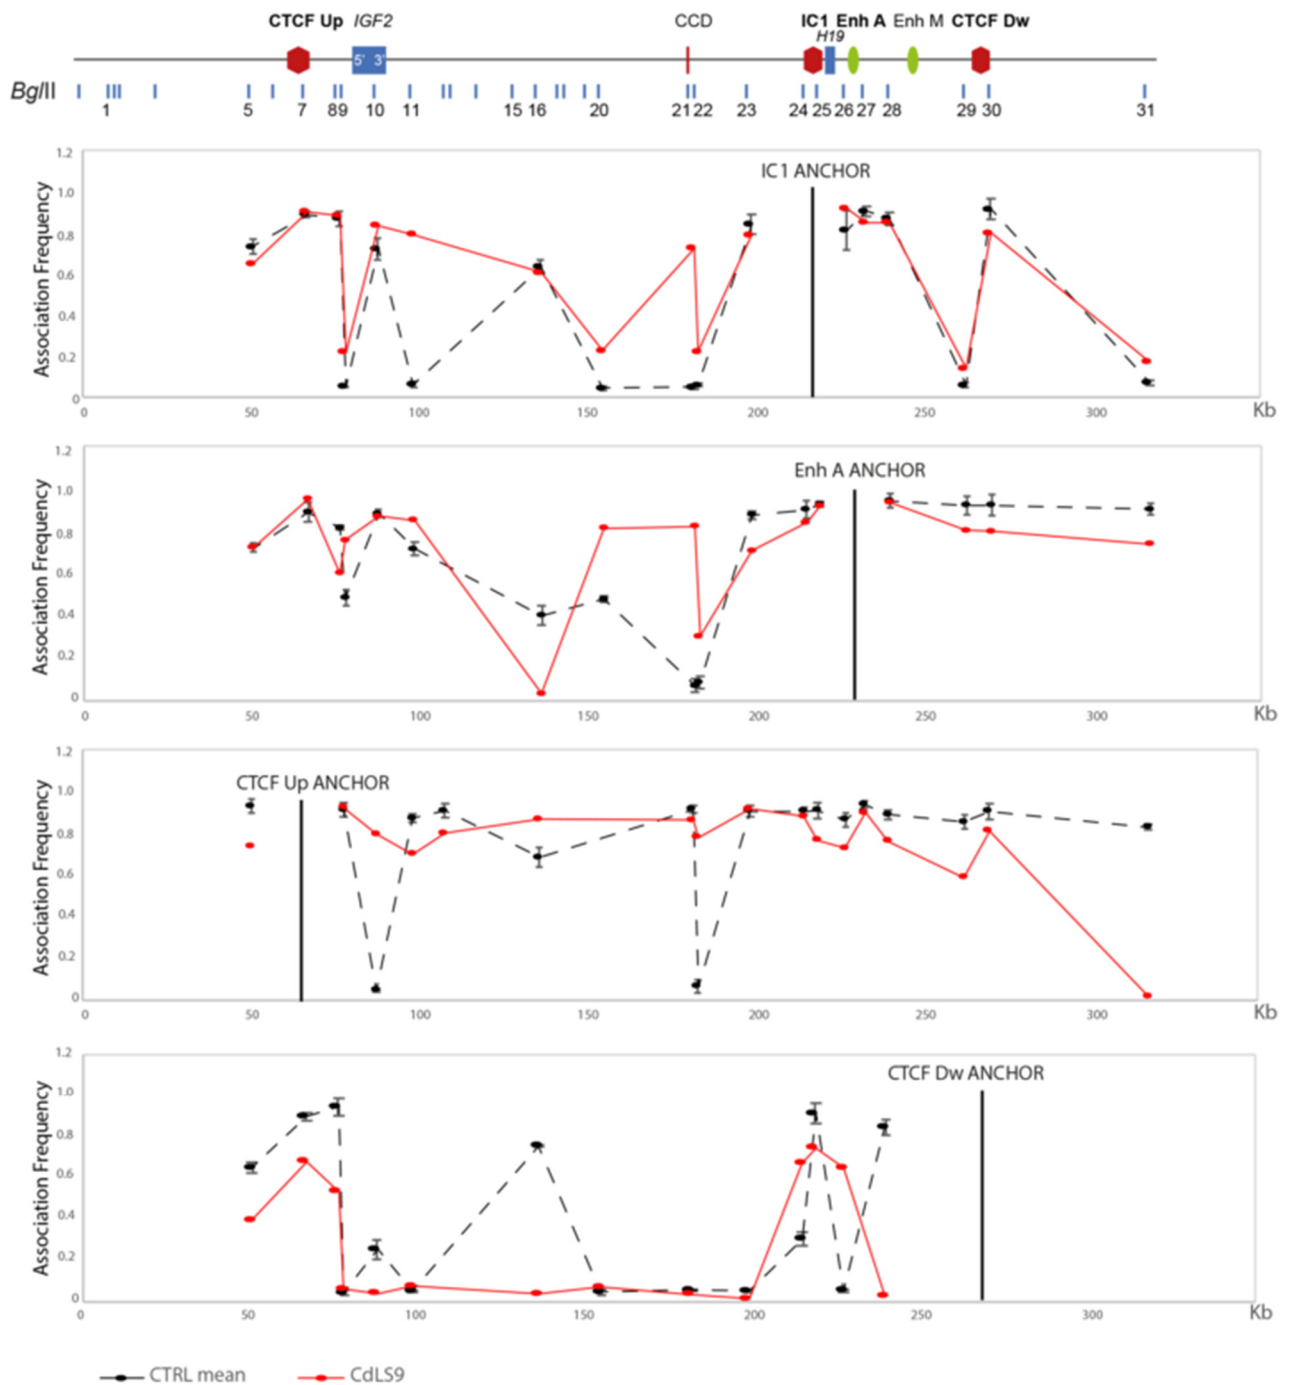

**Figure S1.** Abnormalities in chromatin architecture at the *IC1* locus of the CdLS9 cell line (*NIPBL* mutation). *IC1* locus looping profiles for the indicated anchors in controls (dotted black) and CdLS9 (red) cell lines. BglII restriction sites are indicated above. Each point in the profile is the mean  $\pm$  standard deviation of two independent 3C experiments and indicates the association frequency between the anchor and the fragment on the left of the corresponding BglII restriction site.
