# Supplementary material for: Cohesin Mutations Induce Chromatin Conformation Perturbation of the H19/IGF2 Imprinted Region and Gene Expression Dysregulation in Cornelia de Lange Syndrome Cell Lines
Source: MDPI journal article supplement (doi:10.3390/biom11111622), 2021-11-02
Supplement: s1 [file s1]

Table S2a. Panel of imprinted genes and imprinted related genes analyzed by NCounter Nanostring approach

| <b>GENE</b>                      | <b>Accession</b>    | <b>Log2 fold change</b> | <b>p-value</b> | <b>BH p-value</b> | <b>Annotation</b>                                         |
|----------------------------------|---------------------|-------------------------|----------------|-------------------|-----------------------------------------------------------|
| <i>GNAS</i>                      | NM_080425.1         | 0.494                   | 0.00166        | 0.0887            | Imprinted gene                                            |
| <i>MEST</i>                      | NM_177525.1         | -3.65                   | 0.0109         | 0.13              | Imprinted gene                                            |
| <i>PEG10</i>                     | NM_001040152.1      | -1.56                   | 0.0127         | 0.131             | Imprinted gene                                            |
| <i>GNAS-AS1</i>                  | NR_002785.2:1026    | -0.709                  | 0.0578         | 0.256             | Imprinted lncRNA                                          |
| <i>KCNQ1OT1</i>                  | NR_002728.2:31875   | -0.535                  | 0.0643         | 0.277             | Imprinted lncRNA                                          |
| <i>INSR</i>                      | NM_000208.2:525     | -0.895                  | 0.169          | 0.436             | Imprinted related gene                                    |
| <i>IGF2R</i>                     | NM_000876.1:2605    | 0.324                   | 0.261          | 0.563             | Imprinted related gene                                    |
| <i>FAM50B</i>                    | NM_012135.1:1272    | 0.197                   | 0.289          | 0.594             | Imprinted gene                                            |
| <i>PLAGL1</i>                    | NM_006718.3:1872    | 0.222                   | 0.414          | 0.698             | Imprinted gene                                            |
| Genes below the background level |                     |                         |                |                   |                                                           |
| <i>IGF2</i>                      | NM_001127598.1:2417 | <20 counts              |                |                   | Imprinted Gene, Development & Differentiation, Cell Cycle |
| <i>CDKN1C</i>                    | NM_000076.2:1605    | <20 counts              |                |                   | Imprinted gene                                            |
| <i>H19</i>                       | NR_002196.1:1592    | <20 counts              |                |                   | Imprinted lncRNA                                          |
| <i>MEG3</i>                      | NR_002766.2:691     | <20 counts              |                |                   | Imprinted lncRNA                                          |
| <i>IGF1R</i>                     | NM_000875.4:4580    | <20 counts              |                |                   | Imprinted related gene                                    |
| <i>DLK1</i>                      | NM_003836.4:1328    | <20 counts              |                |                   | Imprinted gene                                            |
| <i>KCNQ1</i>                     | NM_181798.1:835     | <20 counts              |                |                   | Imprinted gene                                            |
| <i>DIRAS3</i>                    | NM_004675.2:950     | <20 counts              |                |                   | Imprinted gene                                            |

Table S2b. Panel of genes of the WNT pathway analyzed by NCounter Nanostring approach

| <b>GENE</b>   | <b>Accession</b> | <b>Log2 fold change</b> | <b>p-value</b> | <b>BH p-value</b> | <b>Pathway annotation</b>                                                                     |
|---------------|------------------|-------------------------|----------------|-------------------|-----------------------------------------------------------------------------------------------|
| <i>RUNX2</i>  | NM_004348.3      | 4.25                    | 0.00151        | 0.0887            | Development & Differentiation, Transcription Factors                                          |
| <i>CDKN2A</i> | NM_000077.3      | 0.971                   | 0.00187        | 0.0887            | Cell Cycle, Development & Differentiation, Transcription Factors                              |
| <i>MAPK10</i> | NM_002753.2      | -4.76                   | 0.002          | 0.0887            | KEGG WNT Annotation                                                                           |
| <i>EGFR</i>   | NM_201282.1      | -6.04                   | 0.0028         | 0.0919            | Adhesion, Calcium Binding and Signaling, Cell Cycle, Development & Differentiation, Migration |
| <i>SFRP1</i>  | NM_003012.3      | 4.41                    | 0.00411        | 0.0919            | Canonical Wnt Pathway, KEGG WNT Annotation, WNT Signaling Negative Regulation                 |
| <i>TCF4</i>   | NM_003199.1      | 0.661                   | 0.00481        | 0.0919            | Transcription Factors                                                                         |
| <i>BMP4</i>   | NM_001202.3      | 3.43                    | 0.00524        | 0.0919            | Development & Differentiation                                                                 |
| <i>PLCB1</i>  | NM_182734.1      | -3.82                   | 0.00524        | 0.0919            | KEGG WNT Annotation                                                                           |
| <i>MMP7</i>   | NM_002423.3      | -3.53                   | 0.00556        | 0.0919            | Calcium Binding and Signaling, KEGG WNT Annotation, Proteolysis, WNT Signaling Target Genes   |
| <i>TGFB3</i>  | NM_003239.2      | 0.978                   | 0.00571        | 0.0919            | Development & Differentiation                                                                 |
| <i>PTGS2</i>  | NM_000963.1      | -3.26                   | 0.00834        | 0.123             | Calcium Binding and Signaling, Cell Cycle                                                     |
| <i>TLE1</i>   | NM_005077.3      | 1.8                     | 0.0106         | 0.13              | WNT Signaling Negative Regulation                                                             |
| <i>FZD5</i>   | NM_003468.2      | -3.03                   | 0.011          | 0.13              | Canonical Wnt Pathway, KEGG WNT Annotation                                                    |
| <i>CXCL12</i> | NM_000609.5      | -3.11                   | 0.0132         | 0.131             | EMT Metastasis                                                                                |
| <i>GDNF</i>   | NM_000514.2      | -2.85                   | 0.0133         | 0.131             | Development & Differentiation, Migration                                                      |
| <i>IRS1</i>   | NM_005544.2      | 1.3                     | 0.016          | 0.149             | Migration                                                                                     |
| <i>FRAT1</i>  | NM_005479.3      | 1.25                    | 0.0185         | 0.164             | Canonical Wnt Pathway, KEGG WNT Annotation                                                    |
| <i>FZD3</i>   | NM_017412.2      | 0.699                   | 0.0211         | 0.173             | Canonical Wnt Pathway, KEGG WNT Annotation                                                    |
| <i>PPP3CC</i> | NM_005605.4      | 0.552                   | 0.0216         | 0.173             | KEGG WNT Annotation                                                                           |

|                 |                |        |        |       |                                                                                                                  |
|-----------------|----------------|--------|--------|-------|------------------------------------------------------------------------------------------------------------------|
| <i>SNAI2</i>    | NM_003068.3    | -2.73  | 0.0249 | 0.191 | EMT Metastasis                                                                                                   |
| <i>KREMEN1</i>  | NM_001039570.1 | -2.52  | 0.0268 | 0.191 | WNT Signaling Negative Regulation                                                                                |
| <i>FZD10</i>    | NM_007197.2    | -2.43  | 0.027  | 0.191 | KEGG WNT Annotation                                                                                              |
| <i>LEF1</i>     | NM_016269.3    | 1.83   | 0.0334 | 0.22  | Canonical Wnt Pathway, KEGG WNT Annotation, Transcription Factors                                                |
| <i>NLK</i>      | NM_016231.2    | 0.519  | 0.0342 | 0.22  | KEGG WNT Annotation, WNT Signaling Negative Regulation                                                           |
| <i>SOX2</i>     | NM_003106.2    | -1.74  | 0.0348 | 0.22  | Cell Cycle, Development & Differentiation, Transcription Factors                                                 |
| <i>PPP3CA</i>   | NM_000944.4    | 1.06   | 0.0401 | 0.237 | KEGG WNT Annotation                                                                                              |
| <i>CXCR4</i>    | NM_003467.2    | -1.63  | 0.0418 | 0.237 | EMT Metastasis                                                                                                   |
| <i>BIRC5</i>    | NM_001168.2    | -0.491 | 0.0427 | 0.237 | Cell Cycle                                                                                                       |
| <i>WNT10B</i>   | NM_003394.2    | -1.26  | 0.0442 | 0.237 | KEGG WNT Annotation                                                                                              |
| <i>SERPINE1</i> | NM_001165413.1 | -2.36  | 0.0442 | 0.237 | EMT Metastasis                                                                                                   |
| <i>TCF7L1</i>   | NM_031283.1    | 0.931  | 0.0477 | 0.24  | Canonical Wnt Pathway, KEGG WNT Annotation, Transcription Factors                                                |
| <i>FZD8</i>     | NM_031866.1    | -2.35  | 0.0479 | 0.24  | Canonical Wnt Pathway, KEGG WNT Annotation                                                                       |
| <i>SMAD2</i>    | NM_005901.5    | 0.165  | 0.0488 | 0.24  | EMT Metastasis, KEGG WNT Annotation                                                                              |
| <i>JUN</i>      | NM_002228.3    | 1.17   | 0.0541 | 0.255 | KEGG WNT Annotation, WNT Signaling Target Genes                                                                  |
| <i>PRKACA</i>   | NM_002730.3    | -0.24  | 0.0552 | 0.255 | KEGG WNT Annotation                                                                                              |
| <i>PPARD</i>    | NM_006238.3    | -0.384 | 0.0562 | 0.255 | Development & Differentiation, KEGG WNT Annotation, Migration, Transcription Factors, WNT Signaling Target Genes |
| <i>RUVBL1</i>   | NM_003707.2    | -0.226 | 0.0707 | 0.291 | Canonical Wnt Pathway, KEGG WNT Annotation                                                                       |
| <i>TBL1XR1</i>  | NM_024665.4    | -0.327 | 0.0764 | 0.307 | KEGG WNT Annotation                                                                                              |
| <i>PPAP2B</i>   | NM_003713.3    | -2.69  | 0.0804 | 0.316 | Migration                                                                                                        |
| <i>COL1A2</i>   | NM_000089.3    | 1.89   | 0.0859 | 0.328 | EMT Metastasis                                                                                                   |
| <i>NKDI</i>     | NM_033119.3    | 0.658  | 0.0872 | 0.328 | Canonical Wnt Pathway, KEGG WNT Annotation, Planar Cell Polarity (PCP), WNT Signaling Negative Regulation        |
| <i>FOXN1</i>    | NM_003593.2    | -1.89  | 0.0917 | 0.338 | Development & Differentiation                                                                                    |
| <i>CTBP1</i>    | NM_001328.2    | 0.163  | 0.101  | 0.365 | Canonical Wnt Pathway, KEGG WNT Annotation, WNT Signaling Negative                                               |

|               |                |        |       |       |                                                                                                           |
|---------------|----------------|--------|-------|-------|-----------------------------------------------------------------------------------------------------------|
|               |                |        |       |       | Regulation                                                                                                |
| <i>DIXDC1</i> | NM_00103795.3  | 0.784  | 0.112 | 0.387 | Canonical Wnt Pathway                                                                                     |
| <i>DAB2</i>   | NM_001343.2    | -1.62  | 0.132 | 0.436 | Development & Differentiation, WNT Signaling Target Genes                                                 |
| <i>DVL2</i>   | NM_004422.2    | -0.182 | 0.137 | 0.436 | Canonical Wnt Pathway, KEGG WNT Annotation, Planar Cell Polarity (PCP)                                    |
| <i>CUL1</i>   | NM_003592.2    | 0.147  | 0.138 | 0.436 | KEGG WNT Annotation                                                                                       |
| <i>WNT8B</i>  | NM_003393.2    | 1.15   | 0.139 | 0.436 | KEGG WNT Annotation                                                                                       |
| <i>RAC2</i>   | NM_002872.3    | 0.262  | 0.139 | 0.436 | KEGG WNT Annotation                                                                                       |
| <i>WNT2B</i>  | NM_024494.1    | 0.807  | 0.141 | 0.436 | Calcium Binding and Signaling, Canonical Wnt Pathway, KEGG WNT Annotation                                 |
| <i>SIX1</i>   | NM_005982.3    | -1.73  | 0.152 | 0.436 | Development & Differentiation, Migration, Transcription Factors                                           |
| <i>CREBBP</i> | NM_001079846.1 | 0.226  | 0.156 | 0.436 | KEGG WNT Annotation                                                                                       |
| <i>AXIN2</i>  | NM_004655.3    | 1.83   | 0.157 | 0.436 | Canonical Wnt Pathway, KEGG WNT Annotation, WNT Signaling Negative Regulation, WNT Signaling Target Genes |
| <i>IGF1</i>   | NM_000618.3    | 1.5    | 0.159 | 0.436 | Cell Cycle, Development & Differentiation, Migration                                                      |
| <i>PPP3R1</i> | NM_000945.3    | 0.189  | 0.16  | 0.436 | KEGG WNT Annotation                                                                                       |
| <i>TCF7</i>   | NM_003202.2    | -0.773 | 0.162 | 0.436 | Canonical Wnt Pathway, KEGG WNT Annotation, Transcription Factors                                         |
| <i>SMAD3</i>  | NM_005902.3    | 0.671  | 0.164 | 0.436 | KEGG WNT Annotation                                                                                       |
| <i>AES</i>    | NM_001130.5    | 0.196  | 0.165 | 0.436 | Canonical Wnt Pathway                                                                                     |
| <i>NRP1</i>   | NM_003873.5    | -3.11  | 0.166 | 0.436 | Development & Differentiation, Migration                                                                  |
| <i>WNT7A</i>  | NM_004625.3    | 1.36   | 0.167 | 0.436 | Calcium Binding and Signaling, Canonical Wnt Pathway, KEGG WNT Annotation                                 |
| <i>FN1</i>    | NM_212482.1    | -1.11  | 0.17  | 0.436 | Development & Differentiation, Migration                                                                  |
| <i>FOSL1</i>  | NM_005438.2    | -0.633 | 0.18  | 0.447 | Cell Cycle, KEGG WNT Annotation, Transcription Factors, WNT Signaling Target Genes                        |
| <i>SMAD4</i>  | NM_005359.3    | 0.161  | 0.18  | 0.447 | KEGG WNT Annotation                                                                                       |
| <i>MYLK</i>   | NM_053032.2    | 0.378  | 0.182 | 0.447 | EMT Metastasis                                                                                            |

|               |                |        |       |       |                                                                                            |
|---------------|----------------|--------|-------|-------|--------------------------------------------------------------------------------------------|
| <i>CCND2</i>  | NM_001759.2    | -0.492 | 0.192 | 0.466 | Cell Cycle, Development & Differentiation, KEGG WNT Annotation, WNT Signaling Target Genes |
| <i>WNT5A</i>  | NM_003392.3    | 1.74   | 0.195 | 0.466 | Calcium Binding and Signaling, KEGG WNT Annotation                                         |
| <i>STAT3</i>  | NM_139276.2    | 0.477  | 0.198 | 0.467 | EMT Metastasis                                                                             |
| <i>FBXW4</i>  | NM_022039.3    | 0.156  | 0.205 | 0.477 | WNT Signaling Negative Regulation                                                          |
| <i>SOX9</i>   | NM_000346.2    | -0.901 | 0.218 | 0.5   | Adhesion, Development & Differentiation, Transcription Factors                             |
| <i>PORCN</i>  | NM_022825.2    | 0.199  | 0.222 | 0.504 | Canonical Wnt Pathway, KEGG WNT Annotation                                                 |
| <i>POU5F1</i> | NM_002701.4    | 0.432  | 0.231 | 0.517 | Development & Differentiation, Transcription Factors                                       |
| <i>TIMP1</i>  | NM_003254.2    | -0.631 | 0.251 | 0.551 | EMT Metastasis                                                                             |
| <i>MAPK8</i>  | NM_002750.2    | -0.349 | 0.252 | 0.551 | KEGG WNT Annotation, Planar Cell Polarity (PCP)                                            |
| <i>MMP2</i>   | NM_004530.2    | -0.968 | 0.267 | 0.569 | Calcium Binding and Signaling, Proteolysis                                                 |
| <i>CCND3</i>  | NM_001760.2    | -0.38  | 0.275 | 0.58  | KEGG WNT Annotation                                                                        |
| <i>PDGFRA</i> | NM_006206.3    | -0.652 | 0.286 | 0.594 | Development & Differentiation, Migration                                                   |
| <i>LRP5</i>   | NM_002335.1    | -0.363 | 0.304 | 0.616 | Canonical Wnt Pathway, KEGG WNT Annotation                                                 |
| <i>PYGO1</i>  | NM_015617.1    | 0.619  | 0.306 | 0.616 | Canonical Wnt Pathway                                                                      |
| <i>WNT4</i>   | NM_030761.3    | -0.718 | 0.317 | 0.624 | Calcium Binding and Signaling, Canonical Wnt Pathway, KEGG WNT Annotation                  |
| <i>ZEB1</i>   | NM_001128128.1 | 0.212  | 0.321 | 0.624 | EMT Metastasis                                                                             |
| <i>CDH11</i>  | NM_001797.2    | -1.13  | 0.323 | 0.624 | EMT Metastasis                                                                             |
| <i>NRCAM</i>  | NM_005010.4    | 1.29   | 0.327 | 0.624 | Adhesion, Development & Differentiation, Migration                                         |
| <i>GSK3A</i>  | NM_019884.2    | -0.056 | 0.331 | 0.624 | Canonical Wnt Pathway                                                                      |
| <i>WNT16</i>  | NM_057168.1    | 0.801  | 0.331 | 0.624 | Calcium Binding and Signaling, Canonical Wnt Pathway, KEGG WNT Annotation                  |
| <i>FBXW11</i> | NM_033645.2    | 0.0985 | 0.345 | 0.643 | KEGG WNT Annotation, WNT Signaling Negative Regulation                                     |
| <i>WNT6</i>   | NM_006522.3    | 1      | 0.377 | 0.689 | Calcium Binding and Signaling, Canonical Wnt Pathway, KEGG WNT Annotation                  |

|               |                |         |       |       |                                                                                      |
|---------------|----------------|---------|-------|-------|--------------------------------------------------------------------------------------|
| <i>CD44</i>   | NM_001001392.1 | 0.28    | 0.378 | 0.689 | Adhesion, Migration                                                                  |
| <i>ID2</i>    | NM_002166.4    | -0.625  | 0.392 | 0.698 | Cell Cycle, Development & Differentiation                                            |
| <i>VEGFA</i>  | NM_001025366.1 | -0.705  | 0.395 | 0.698 | Development & Differentiation, Migration                                             |
| <i>MMP9</i>   | NM_004994.2    | 0.608   | 0.401 | 0.698 | Calcium Binding and Signaling, Development & Differentiation, Migration, Proteolysis |
| <i>WNT9B</i>  | NM_003396.1    | 0.553   | 0.403 | 0.698 | KEGG WNT Annotation                                                                  |
| <i>FZD6</i>   | NM_003506.2    | -0.606  | 0.403 | 0.698 | Canonical Wnt Pathway, KEGG WNT Annotation                                           |
| <i>MAPK9</i>  | NM_139068.2    | 0.066   | 0.406 | 0.698 | KEGG WNT Annotation                                                                  |
| <i>BTRC</i>   | NM_033637.2    | -0.113  | 0.411 | 0.698 | KEGG WNT Annotation, WNT Signaling Negative Regulation, WNT Signaling Target Genes   |
| <i>PRKACB</i> | NM_182948.2    | 0.427   | 0.421 | 0.7   | KEGG WNT Annotation                                                                  |
| <i>WNT5B</i>  | NM_032642.2    | -0.428  | 0.423 | 0.7   | Calcium Binding and Signaling, KEGG WNT Annotation                                   |
| <i>ERBB2</i>  | NM_001005862.1 | -0.242  | 0.429 | 0.703 | EMT Metastasis                                                                       |
| <i>LRP6</i>   | NM_002336.1    | -0.806  | 0.434 | 0.703 | Canonical Wnt Pathway, KEGG WNT Annotation, WNT Signaling Negative Regulation        |
| <i>RAC3</i>   | NM_005052.2    | 0.152   | 0.437 | 0.703 | KEGG WNT Annotation                                                                  |
| <i>PLAUR</i>  | NM_001005376.1 | -0.333  | 0.446 | 0.705 | Proteolysis                                                                          |
| <i>CDH1</i>   | NM_004360.2    | 1       | 0.448 | 0.705 | Adhesion, Development & Differentiation, EMT Metastasis                              |
| <i>CXXC4</i>  | NM_025212.1    | -0.669  | 0.454 | 0.705 | Canonical Wnt Pathway, KEGG WNT Annotation, WNT Signaling Negative Regulation        |
| <i>PRKX</i>   | NM_005044.1    | 0.198   | 0.455 | 0.705 | KEGG WNT Annotation                                                                  |
| <i>MYC</i>    | NM_002467.3    | 0.253   | 0.458 | 0.705 | Cell Cycle, KEGG WNT Annotation, Transcription Factors, WNT Signaling Target Genes   |
| <i>APC</i>    | NM_000038.3    | 0.0957  | 0.477 | 0.725 | Canonical Wnt Pathway, KEGG WNT Annotation, WNT Signaling Negative Regulation        |
| <i>RAC1</i>   | NM_198829.1    | -0.0704 | 0.479 | 0.725 | KEGG WNT Annotation                                                                  |

|                |                |         |       |       |                                                                               |
|----------------|----------------|---------|-------|-------|-------------------------------------------------------------------------------|
| <i>VANGL1</i>  | NM_138959.2    | -0.341  | 0.5   | 0.747 | KEGG WNT Annotation                                                           |
| <i>SFRP4</i>   | NM_003014.2    | 0.781   | 0.507 | 0.747 | Canonical Wnt Pathway, KEGG WNT Annotation, WNT Signaling Negative Regulation |
| <i>FGF7</i>    | NM_002009.3    | 0.585   | 0.51  | 0.747 | Migration                                                                     |
| <i>RHOA</i>    | NM_001664.2    | -0.0851 | 0.518 | 0.747 | KEGG WNT Annotation, Planar Cell Polarity (PCP)                               |
| <i>RBX1</i>    | NM_014248.2    | -0.0823 | 0.526 | 0.747 | KEGG WNT Annotation                                                           |
| <i>SOST</i>    | NM_025237.2    | 0.585   | 0.527 | 0.747 | Canonical Wnt Pathway                                                         |
| <i>PPP3CB</i>  | NM_001142354.1 | 0.0756  | 0.528 | 0.747 | KEGG WNT Annotation                                                           |
| <i>NFATC1</i>  | NM_172389.1    | -0.301  | 0.528 | 0.747 | Calcium Binding and Signaling, KEGG WNT Annotation                            |
| <i>PKN1</i>    | NM_213560.1    | 0.0702  | 0.536 | 0.749 | EMTMetastasis                                                                 |
| <i>WIF1</i>    | NM_007191.2    | 0.329   | 0.537 | 0.749 | Canonical Wnt Pathway, KEGG WNT Annotation, WNT Signaling Negative Regulation |
| <i>EP300</i>   | NM_001429.2    | 0.109   | 0.555 | 0.764 | Canonical Wnt Pathway, KEGG WNT Annotation                                    |
| <i>FZD2</i>    | NM_001466.2    | 0.506   | 0.557 | 0.764 | Calcium Binding and Signaling, Canonical Wnt Pathway, KEGG WNT Annotation     |
| <i>AHR</i>     | NM_001621.3    | -0.418  | 0.567 | 0.772 | Cell Cycle, Transcription Factors                                             |
| <i>WNT7B</i>   | NM_058238.1    | 0.656   | 0.586 | 0.79  | Calcium Binding and Signaling, Canonical Wnt Pathway, KEGG WNT Annotation     |
| <i>CSNK2A1</i> | NM_177559.2    | 0.0647  | 0.589 | 0.79  | Canonical Wnt Pathway, KEGG WNT Annotation                                    |
| <i>WNT10A</i>  | NM_025216.2    | -0.278  | 0.611 | 0.813 | Calcium Binding and Signaling, Canonical Wnt Pathway, KEGG WNT Annotation     |
| <i>PITX2</i>   | NM_000325.5    | 0.467   | 0.624 | 0.825 | Transcription Factors, WNT Signaling Target Genes                             |
| <i>DKK4</i>    | NM_014420.2    | -0.225  | 0.641 | 0.833 | KEGG WNT Annotation                                                           |
| <i>SFRP2</i>   | NM_003013.2    | -0.341  | 0.646 | 0.833 | KEGG WNT Annotation                                                           |
| <i>CEBPD</i>   | NM_005195.3    | -0.269  | 0.646 | 0.833 | Transcription Factors                                                         |
| <i>DVL1</i>    | NM_004421.2    | 0.0857  | 0.649 | 0.833 | Canonical Wnt Pathway, KEGG WNT Annotation, Planar Cell Polarity (PCP)        |

|               |                |         |       |       |                                                                                                                                                              |
|---------------|----------------|---------|-------|-------|--------------------------------------------------------------------------------------------------------------------------------------------------------------|
| <i>ETS2</i>   | NM_005239.4    | -0.205  | 0.657 | 0.837 | Transcription Factors                                                                                                                                        |
| <i>FZD4</i>   | NM_012193.2    | 0.369   | 0.67  | 0.848 | Canonical Wnt Pathway, KEGG WNT Annotation                                                                                                                   |
| <i>PRKCB</i>  | NM_212535.1    | -0.126  | 0.684 | 0.858 | KEGG WNT Annotation                                                                                                                                          |
| <i>FZD1</i>   | NM_003505.1    | 0.292   | 0.698 | 0.868 | Canonical Wnt Pathway, KEGG WNT Annotation                                                                                                                   |
| <i>BAMBI</i>  | NM_012342.2    | 0.492   | 0.702 | 0.868 | Canonical Wnt Pathway                                                                                                                                        |
| <i>CCND1</i>  | NM_053056.2    | -0.339  | 0.722 | 0.887 | Calcium Binding and Signaling, Cell Cycle, Development & Differentiation, KEGG WNT Annotation, WNT Signaling Negative Regulation, WNT Signaling Target Genes |
| <i>AXIN1</i>  | NM_181050.1    | 0.0343  | 0.746 | 0.899 | Canonical Wnt Pathway, KEGG WNT Annotation, WNT Signaling Negative Regulation                                                                                |
| <i>WNT3</i>   | NM_030753.3    | 0.189   | 0.747 | 0.899 | Calcium Binding and Signaling, Canonical Wnt Pathway, KEGG WNT Annotation                                                                                    |
| <i>GSK3B</i>  | NM_002093.2    | -0.0331 | 0.754 | 0.899 | Canonical Wnt Pathway, KEGG WNT Annotation                                                                                                                   |
| <i>WNT11</i>  | NM_004626.2    | -0.381  | 0.756 | 0.899 | Calcium Binding and Signaling, KEGG WNT Annotation                                                                                                           |
| <i>FZD7</i>   | NM_003507.1    | -0.288  | 0.757 | 0.899 | Canonical Wnt Pathway, KEGG WNT Annotation                                                                                                                   |
| <i>SMO</i>    | NM_005631.3    | -0.172  | 0.772 | 0.911 | Development & Differentiation, Migration                                                                                                                     |
| <i>CAMK2B</i> | NM_001220.3    | -0.216  | 0.787 | 0.923 | KEGG WNT Annotation                                                                                                                                          |
| <i>T</i>      | NM_003181.2    | 0.343   | 0.802 | 0.933 | Development & Differentiation, Transcription Factors                                                                                                         |
| <i>FRZB</i>   | NM_001463.2    | 0.222   | 0.808 | 0.935 | WNT Signaling Negative Regulation                                                                                                                            |
| <i>TGFB1</i>  | NM_000660.3    | -0.0305 | 0.819 | 0.937 | EMT Metastasis                                                                                                                                               |
| <i>CTNNB1</i> | NM_001098210.1 | 0.0236  | 0.827 | 0.937 | Canonical Wnt Pathway, KEGG WNT Annotation                                                                                                                   |
| <i>EGR1</i>   | NM_001964.2    | 0.206   | 0.828 | 0.937 | Development & Differentiation, Transcription Factors                                                                                                         |
| <i>GPC4</i>   | NM_001448.2    | -0.519  | 0.837 | 0.937 | Canonical Wnt Pathway                                                                                                                                        |
| <i>PRKCA</i>  | NM_002737.2    | 0.159   | 0.837 | 0.937 | KEGG WNT Annotation                                                                                                                                          |
| <i>KLF5</i>   | NM_001730.3    | 0.113   | 0.847 | 0.937 | Transcription Factors                                                                                                                                        |
| <i>IL6</i>    | NM_000600.1    | -0.157  | 0.852 | 0.937 | Development & Differentiation, Migration                                                                                                                     |



|                                         |                |            |       |       |                                                                               |
|-----------------------------------------|----------------|------------|-------|-------|-------------------------------------------------------------------------------|
| <i>FZD9</i>                             | NM_003508.2    | -0.115     | 0.854 | 0.937 | Canonical Wnt Pathway, KEGG WNT Annotation                                    |
| <i>ZEB2</i>                             | NM_014795.3    | 0.0998     | 0.857 | 0.937 | EMT Metastasis                                                                |
| <i>JAG1</i>                             | NM_000214.2    | -0.106     | 0.865 | 0.939 | Development & Differentiation, Migration                                      |
| <i>EFNB1</i>                            | NM_004429.4    | -0.0881    | 0.877 | 0.943 | Development & Differentiation, Migration                                      |
| <i>DKK3</i>                             | NM_001018057.1 | 0.0555     | 0.879 | 0.943 | Canonical Wnt Pathway, WNT Signaling Negative Regulation                      |
| <i>SOX17</i>                            | NM_022454.3    | 0.0902     | 0.895 | 0.953 | Canonical Wnt Pathway, KEGG WNT Annotation, WNT Signaling Negative Regulation |
| <i>NANOG</i>                            | NM_024865.2    | -0.0481    | 0.899 | 0.953 | Development & Differentiation, Transcription Factors                          |
| <i>PRKCG</i>                            | NM_002739.3    | -0.0605    | 0.931 | 0.972 | KEGG WNT Annotation                                                           |
| <i>CSNK1A1</i>                          | NM_001892.4    | 0.00903    | 0.937 | 0.972 | Canonical Wnt Pathway, KEGG WNT Annotation                                    |
| <i>TP53</i>                             | NM_000546.2    | 0.011      | 0.942 | 0.972 | KEGG WNT Annotation                                                           |
| <i>WNT2</i>                             | NM_003391.2    | 0.0512     | 0.944 | 0.972 | Calcium Binding and Signaling, Canonical Wnt Pathway, KEGG WNT Annotation     |
| <i>SKP1</i>                             | NM_170679.2    | 0.00273    | 0.978 | 1     | KEGG WNT Annotation                                                           |
| <i>BCL9</i>                             | NM_004326.2    | 0.00212    | 0.994 | 1     | Canonical Wnt Pathway                                                         |
| <i>SNAIL</i>                            | NM_005985.2    | 6.97e-16   | 1     | 1     | EMT Metastasis                                                                |
| <b>Genes below the background level</b> |                |            |       |       |                                                                               |
| <i>CTGF</i>                             | NM_001901.2    | <20 counts |       |       | Development & Differentiation, Migration, Adhesion                            |
| <i>PRKACG</i>                           | NM_002732.2    | <20 counts |       |       | KEGG WNT Annotation                                                           |
| <i>DPP10</i>                            | NM_020868.3    | <20 counts |       |       | Proteolysis                                                                   |
| <i>WNT1</i>                             | NM_005430.2    | <20 counts |       |       | Calcium Binding and Signaling, Canonical Wnt Pathway, KEGG WNT Annotation     |
| <i>TWIST1</i>                           | NM_000474.3    | <20 counts |       |       | Development & Differentiation, Migration                                      |
| <i>FGF4</i>                             | NM_002007.2    | <20 counts |       |       | Development & Differentiation, Adhesion                                       |
| <i>MMP3</i>                             | NM_002422.3    | <20 counts |       |       | EMT Metastasis                                                                |
| <i>IGF2</i>                             | NM_001127598.1 | <20 counts |       |       | Imprinted Gene, Development & Differentiation, Cell Cycle                     |

|                                  |                |              |  |  |                                                                                |
|----------------------------------|----------------|--------------|--|--|--------------------------------------------------------------------------------|
| <i>WNT8A</i>                     | NM_058244.2    | <20 counts   |  |  | Calcium Binding and Signaling, Canonical Wnt Pathway, KEGG WNT Annotation      |
| <i>PPP3R2</i>                    | NM_147180.2    | <20 counts   |  |  | KEGG WNT Annotation                                                            |
| <i>TWIST2</i>                    | NM_057179.2    | <20 counts   |  |  | EMT Metastasis                                                                 |
| <i>PROM1</i>                     | NM_006017.1    | <20 counts   |  |  | EMT Metastasis                                                                 |
| <i>PLCB4</i>                     | NM_000933.3    | <20 counts   |  |  | KEGG WNT Annotation                                                            |
| <i>WNT9A</i>                     | NM_003395.1    | <20 counts   |  |  | Calcium Binding and Signaling, KEGG WNT Annotation, Planar Cell Polarity (PCP) |
| <i>DKK2</i>                      | NM_014421.2    | <20 counts   |  |  | KEGG WNT Annotation                                                            |
| <i>DKK1</i>                      | NM_012242.2    | <20 counts   |  |  | Canonical Wnt Pathway, KEGG WNT Annotation, WNT Signaling Negative Regulation  |
| <i>WISP1</i>                     | NM_080838.1    | <20 counts   |  |  | WNT Signaling Target Genes                                                     |
| <b>HOUSEKEEPING IN THE PANEL</b> |                |              |  |  |                                                                                |
| <i>CC2D1B</i>                    | NM_032449.2    | Housekeeping |  |  |                                                                                |
| <i>COG7</i>                      | NM_153603.3    | Housekeeping |  |  |                                                                                |
| <i>EDC3</i>                      | NM_001142443.1 | Housekeeping |  |  |                                                                                |
| <i>GPATCH3</i>                   | NM_022078.2    | Housekeeping |  |  |                                                                                |
| <i>HDAC3</i>                     | NM_003883.2    | Housekeeping |  |  |                                                                                |
| <i>MTMR14</i>                    | NM_022485.3    | Housekeeping |  |  |                                                                                |
| <i>NUBP1</i>                     | NM_001278506.1 | Housekeeping |  |  |                                                                                |
| <i>PRPF38A</i>                   | NM_032864.3    | Housekeeping |  |  |                                                                                |
| <i>SAP130</i>                    | NM_024545.3    | Housekeeping |  |  |                                                                                |
| <i>SF3A3</i>                     | NM_006802.2    | Housekeeping |  |  |                                                                                |
| <i>TLK2</i>                      | NM_006852.2    | Housekeeping |  |  |                                                                                |
| <i>ZC3H14</i>                    | NM_001160103.1 | Housekeeping |  |  |                                                                                |

Abbreviations: KEGG, Kyoto Encyclopedia of Genes and Genomes; EMT, Epithelial mesenchymal transition
